# Supplementary material
Source: publisher figshare collection journal article supplement (https://tandf.figshare.com/articles/dataset/_/9761468)
Supplement: Supplementary file 1 [file 1]

**Table S1:** Time-of-day effects for different maximum strength parameters.

| Strength parameter                   | Overall effect   |         | Maximum estimated difference between two time points |
|--------------------------------------|------------------|---------|------------------------------------------------------|
|                                      | Chi <sup>2</sup> | p-value |                                                      |
| <b>Leg strength</b>                  |                  |         |                                                      |
| isometric                            | 0.71             | 0.982   | 0.10 N.kg <sup>-1</sup>                              |
| concentric at 120 mm.s <sup>-1</sup> | 21.01            | 0.001   | 0.67 N.kg <sup>-1</sup>                              |
| eccentric at 120 mm.s <sup>-1</sup>  | 6.16             | 0.291   | 0.33 N.kg <sup>-1</sup>                              |
| concentric at 240 mm.s <sup>-1</sup> | 6.21             | 0.286   | 0.27 N.kg <sup>-1</sup>                              |
| eccentric at 240 mm.s <sup>-1</sup>  | 6.21             | 0.286   | 0.26 N.kg <sup>-1</sup>                              |
| rfd 0-50 ms                          | 11.96            | 0.035   | 0.37 N.ms <sup>-1</sup>                              |
| rfd 0-150 ms                         | 7.39             | 0.193   | 0.15 N.ms <sup>-1</sup>                              |
| <b>Arm strength</b>                  |                  |         |                                                      |
| isometric                            | 5.65             | 0.342   | 0.09 N.kg <sup>-1</sup>                              |
| concentric at 120 mm.s <sup>-1</sup> | 5.46             | 0.362   | 0.07 N.kg <sup>-1</sup>                              |
| eccentric at 120 mm.s <sup>-1</sup>  | 1.47             | 0.917   | 0.05 N.kg <sup>-1</sup>                              |
| rfd 0-50 ms                          | 5.44             | 0.365   | 0.13 N.ms <sup>-1</sup>                              |
| rfd 0-150 ms                         | 13.81            | 0.017   | 0.04 N.ms <sup>-1</sup>                              |
| <b>Trunk strength</b>                |                  |         |                                                      |
| isometric flexion                    | 0.78             | 0.978   | 0.05 Nm.kg <sup>-1</sup>                             |
| isometric extension                  | 9.89             | 0.079   | 0.32 Nm.kg <sup>-1</sup>                             |
| concentric flexion                   | 5.23             | 0.388   | 0.08 Nm.kg <sup>-1</sup>                             |
| concentric extension                 | 0.84             | 0.975   | 0.08 Nm.kg <sup>-1</sup>                             |
| flexion rtd 0-50 ms                  | 4.61             | 0.466   | 0.28 Nm.ms <sup>-1</sup>                             |
| extension rtd 0-50 ms                | 6.81             | 0.235   | 0.48 Nm.ms <sup>-1</sup>                             |
| flexion rtd 0-150 ms                 | 10.49            | 0.062   | 0.15 Nm.ms <sup>-1</sup>                             |
| extension rtd 0-150 ms               | 2.73             | 0.742   | 0.13 Nm.ms <sup>-1</sup>                             |
| <b>Balance / Jump</b>                |                  |         |                                                      |
| dominant leg                         | 4.58             | 0.470   | 0.01 score                                           |
| non-dominant leg                     | 3.26             | 0.660   | 0.01 score                                           |
| jumping height                       | 23.38            | ≤ 0.001 | 3.1 cm                                               |

Abbreviations: rfd, rate of force development, rtd, rate of torque development; score, y-balance composite score.
